# Supplementary material for: The Notch and Wnt pathways regulate stemness and differentiation in human fallopian tube organoids
Source: Nat Commun. 2015 Dec 8;6:8989. doi: 10.1038/ncomms9989 (PMC4686873; doi:10.1038/ncomms9989)
Supplement: Supplementary Information — Supplementary Figures 1-6, Supplementary Table 1 and Supplementary References. [file ncomms9989-s1.pdf]

**a**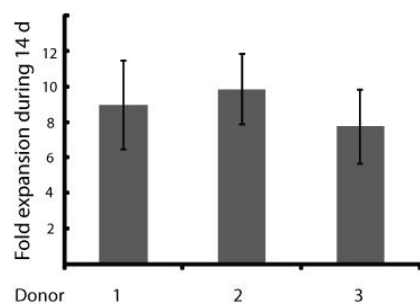**b**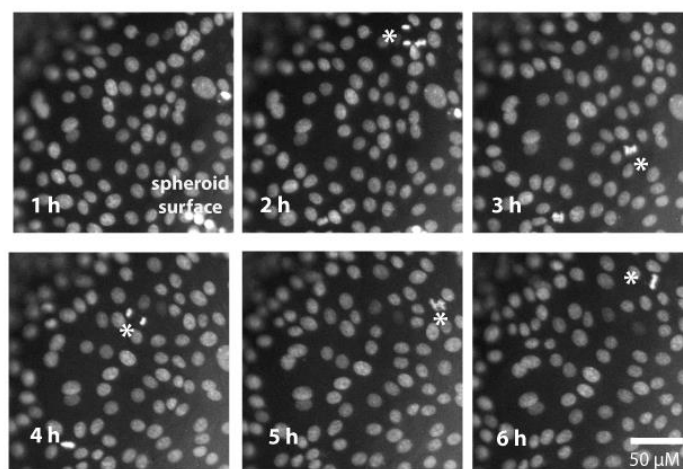**c**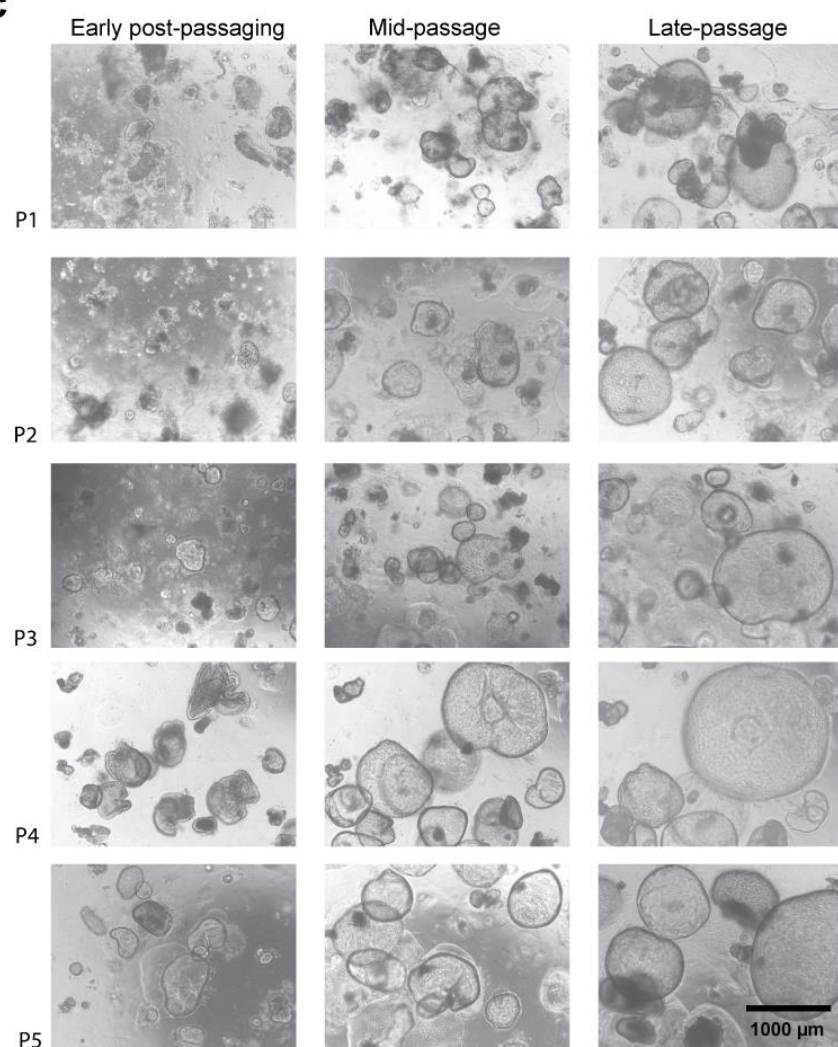**e**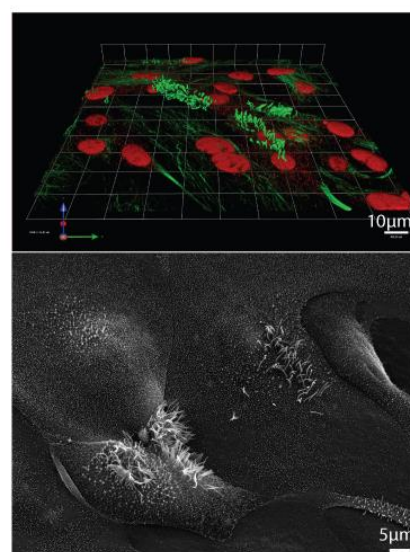**d**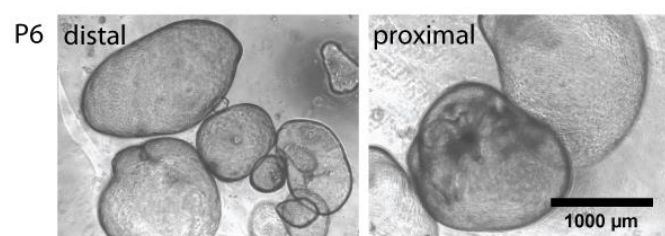

### **Supplementary Fig. 1 Fallopian tube organoids show robust and stable growth in long-term culture**

**a)** Cell proliferation during two weeks of culture, determined for organoids from 3 different donors in passage 0 (donor 1), passage 2 (donor 2) and passage 4 (donor 3). Error bars represent S.D. of five technical replicates for each condition. **b)** Representative images of the surface of a growing organoid labeled with Hoechst 33342 for 6 h. Several mitotic planes (asterisks) are clearly visible in actively dividing cells. **c)** Overview of growth in a representative long-term 3D culture over the course of five passages, showing increasing size of individual organoids during a single passage. **d)** Phase contrast images of organoids in passage 6 (3 months) generated from the distal and proximal parts of the tube, reveal a stable phenotype from both regions **e)** Immunofluorescence labeling of epithelial isolates from fallopian tube tissue shows PAX8 positive cells as well as ciliated cells (upper panel). Cilia are also visualized by scanning electron microscopy (lower panel).

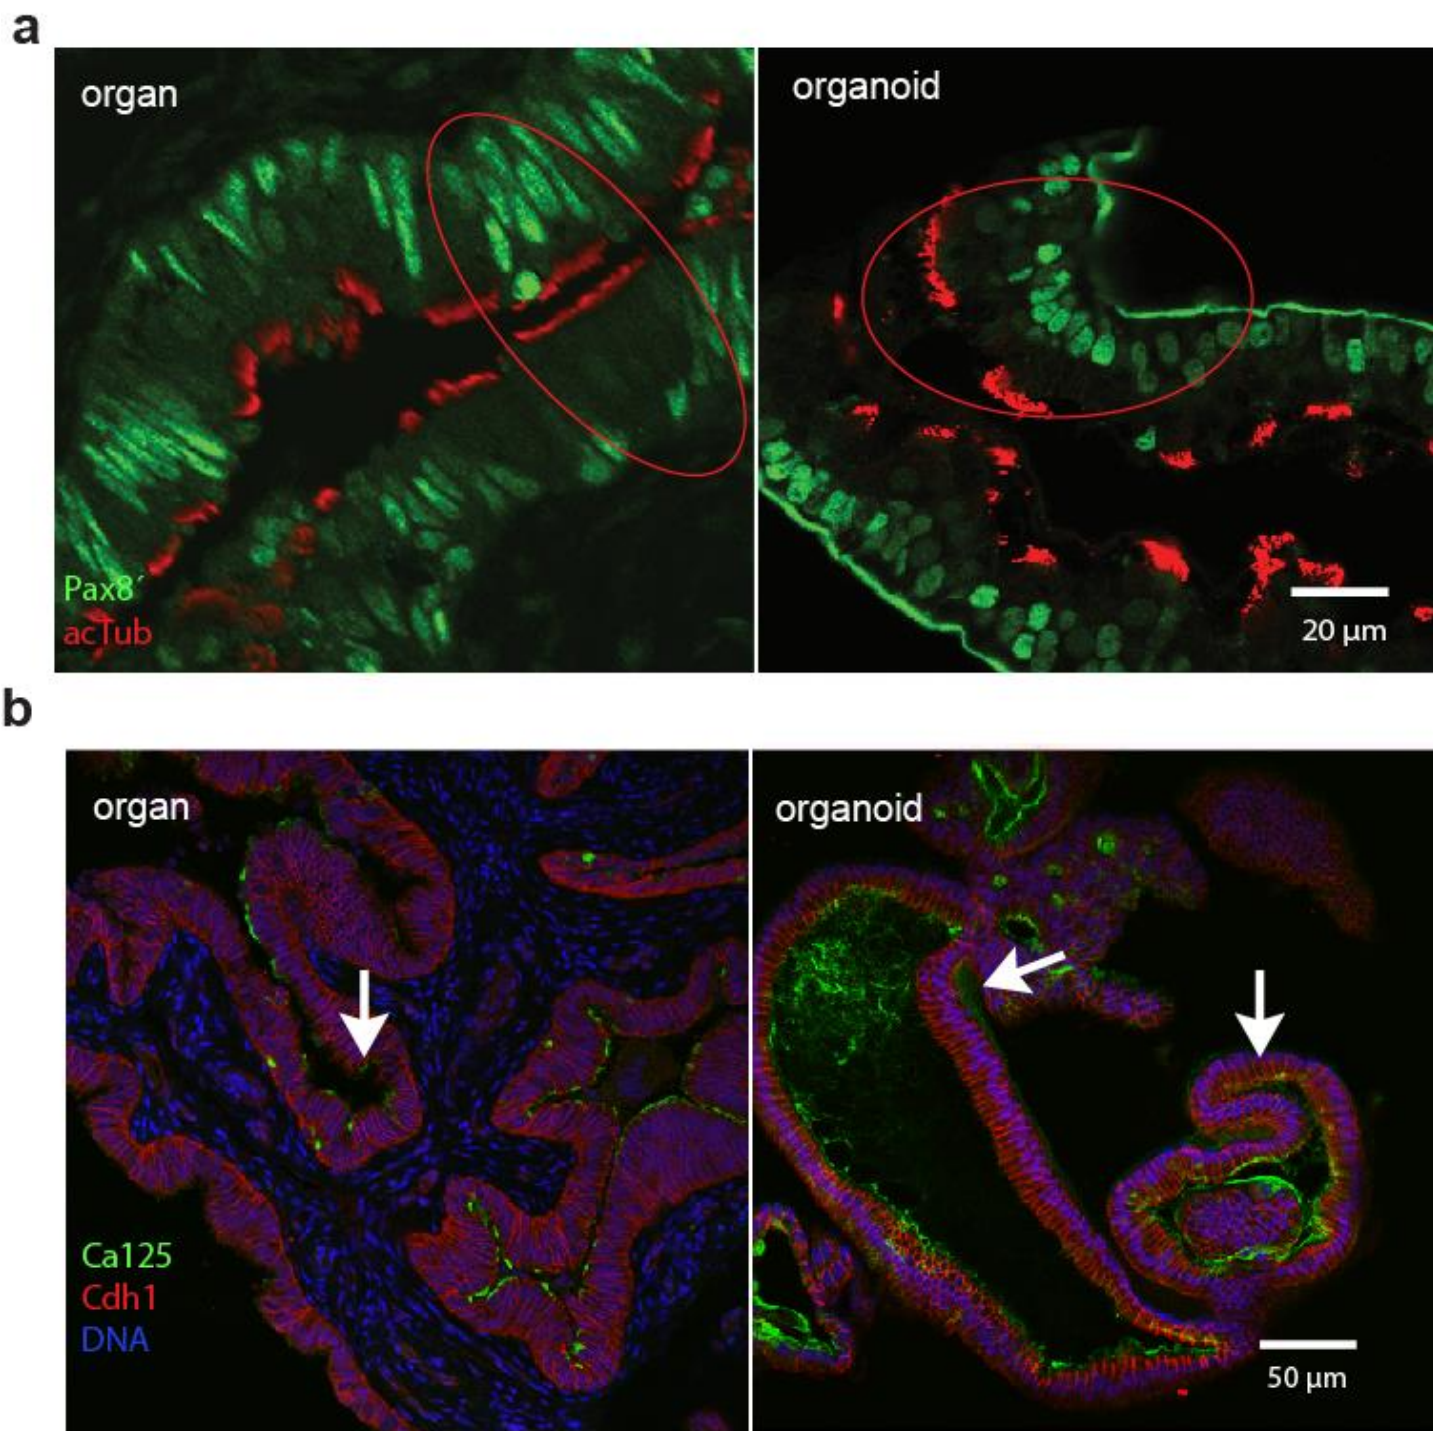

**Supplementary Fig. 2 Organoids express functional and differentiation markers of native fallopian tube tissue**

**a)** Confocal images of organoid (85 days *in vitro*) and tissue sections with PAX8 (green) and ac tubulin (red) reveal the presence of both PAX8 negative ciliated cells as well as PAX8/ac tubulin double positive cells (red circles). **b)** Organoids show a similar pattern of Ca125 expression (left, green) to the one observed in tissue (right). Confocal images of organoids also confirm extensive epithelial folding (arrows).

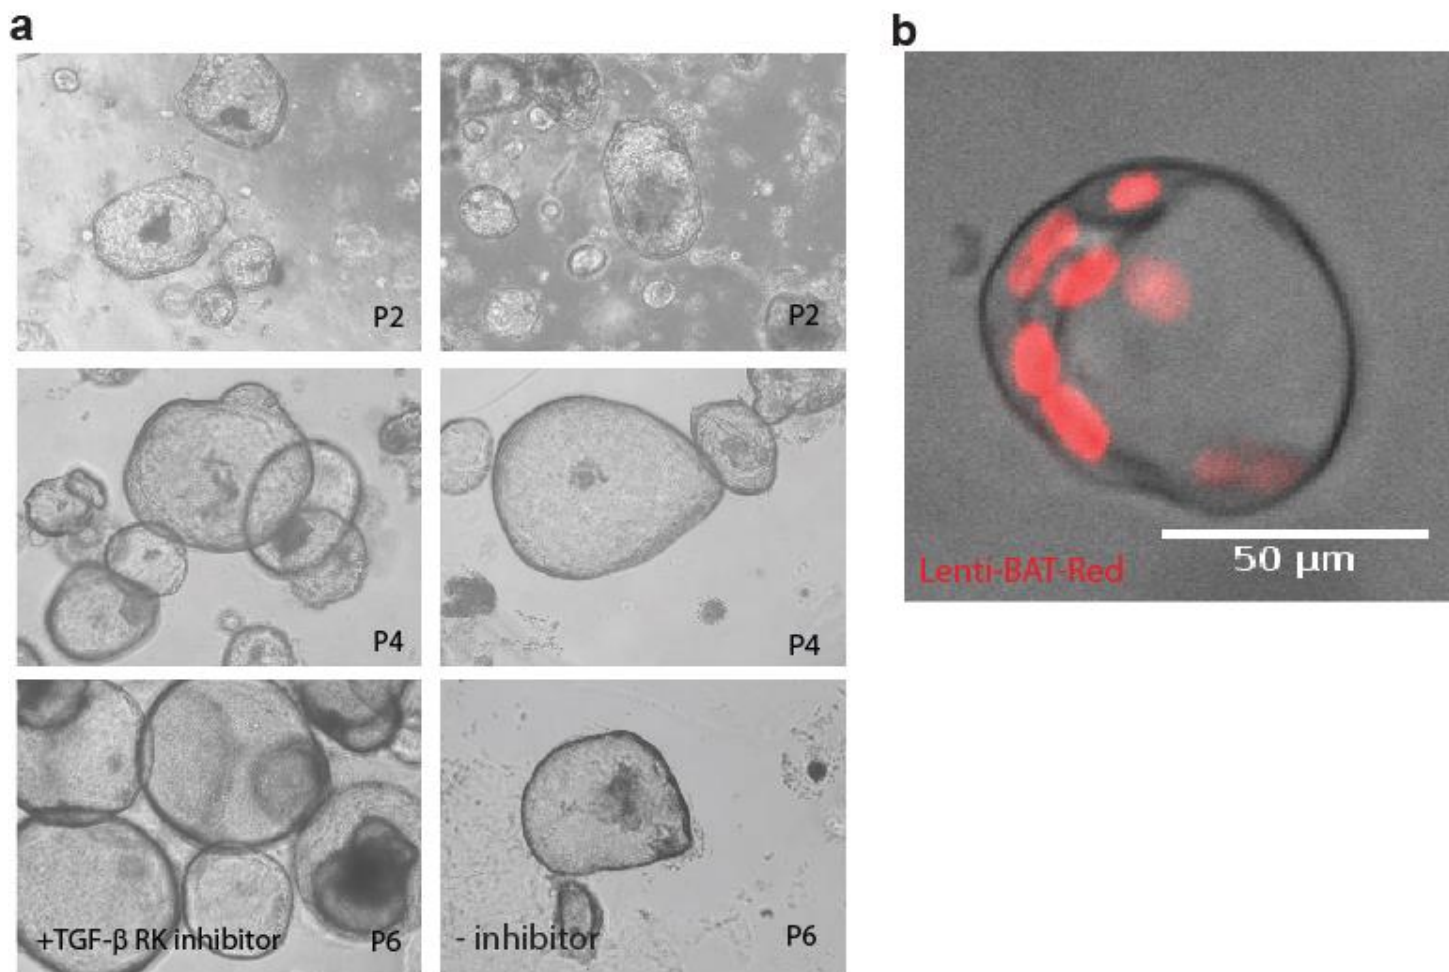

**Supplementary Fig. 3 Suppression of TGF- $\beta$  signaling is required for long-term organoid cultivation**

**a)** Phase contrast images of organoid cultures expanded with or without TGF- $\beta$  receptor kinase (RK) inhibitor. Expansion of cultures beyond passage 6 was only possible with continuous TGF- $\beta$  RK inhibitor supplementation. **b)** Epifluorescence image of the TCF/LEF (Lenti-Bat-Red reporter) in an early organoid, confirming Wnt activation.

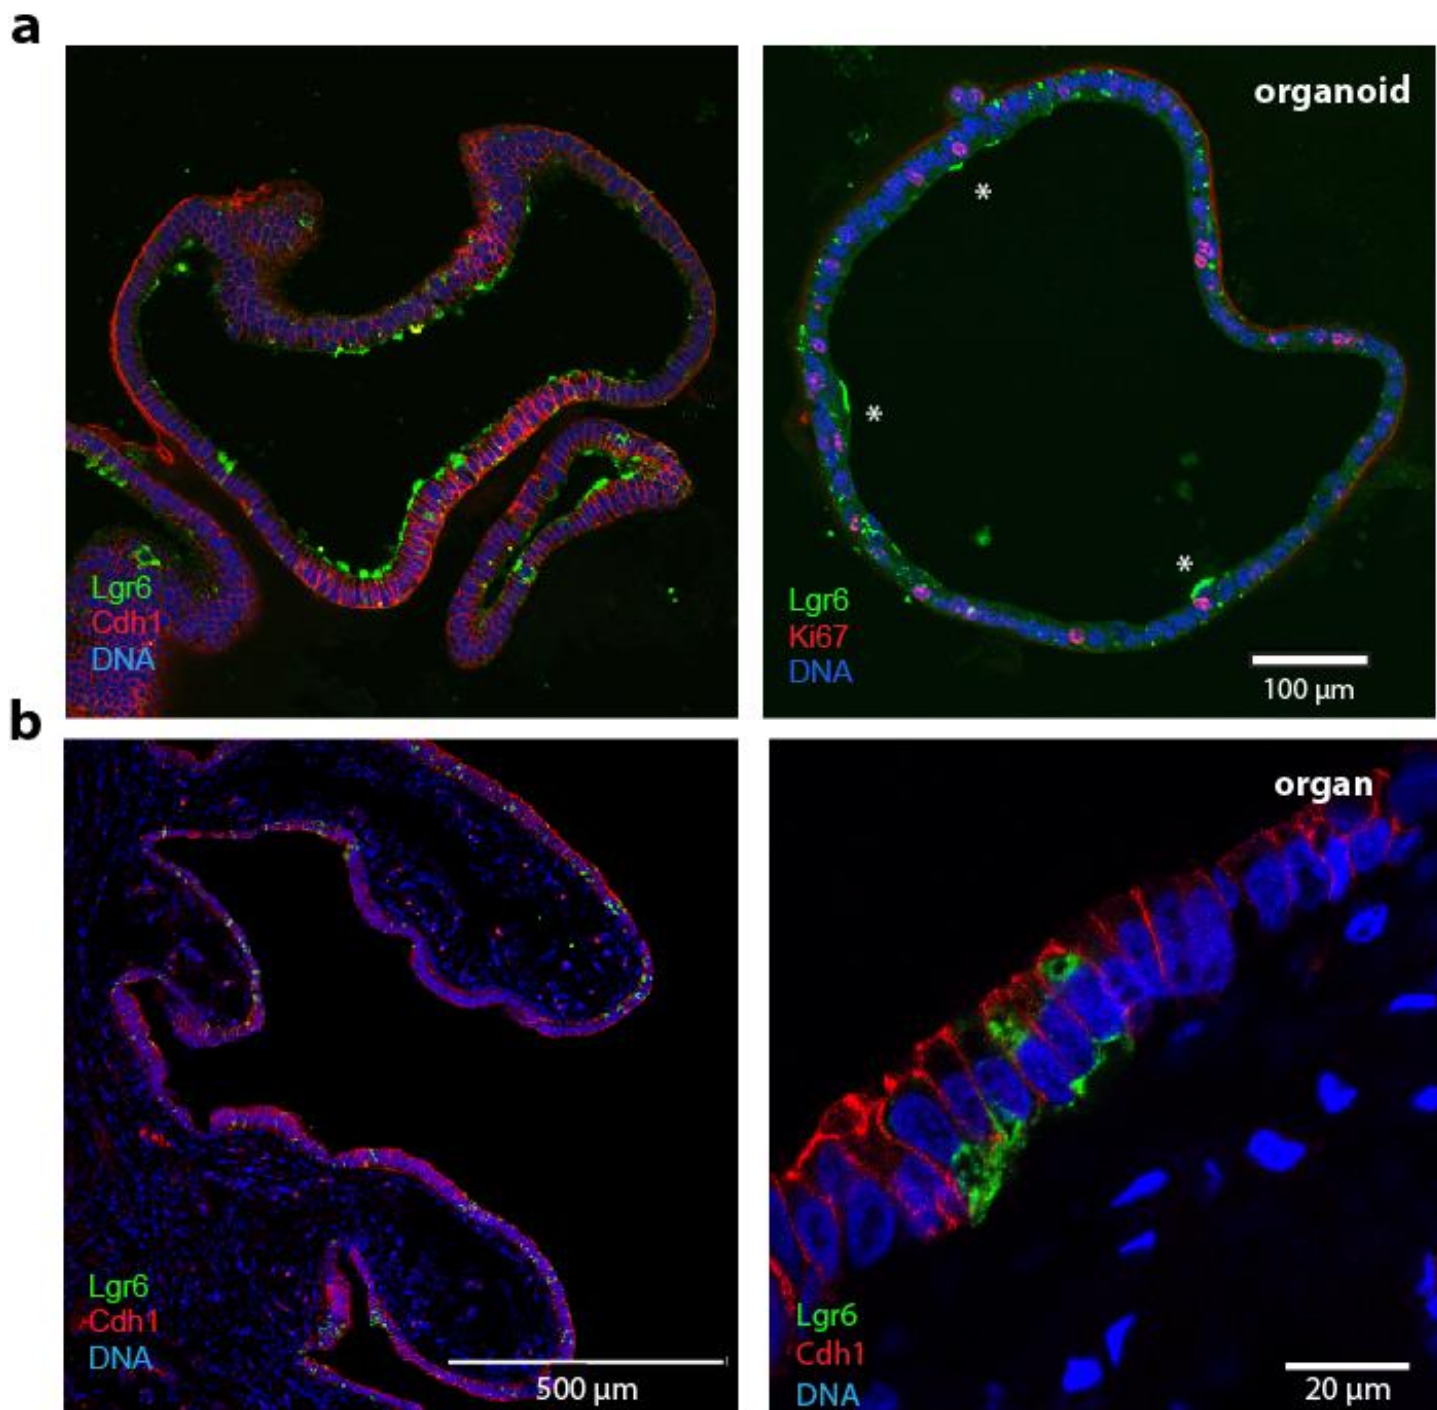

**Supplementary Fig. 4 Organoids express Lgr 6**

Representative confocal images showing the distribution of Lgr6 positive cells (green) in growing organoids (**a**) and in fallopian tube sections (**b**).

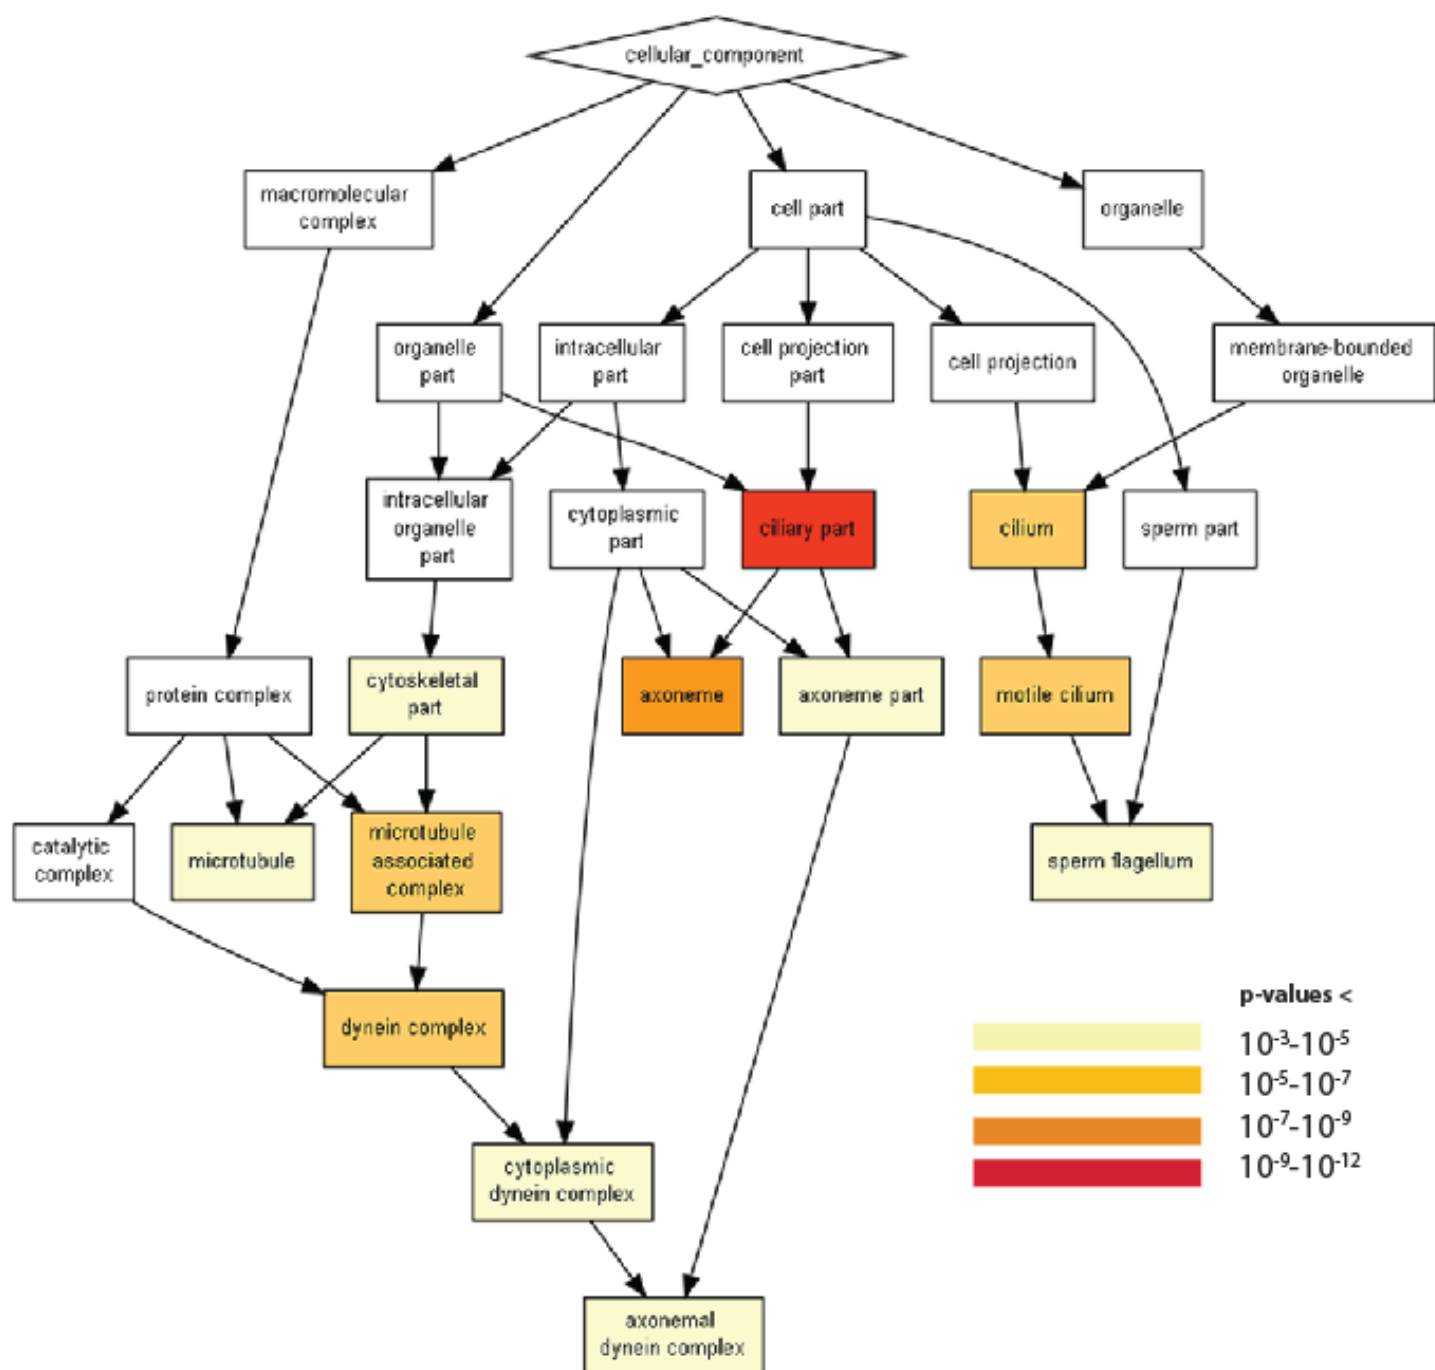

### Supplementary Fig. 5 Cluster of genes involved in ciliogenesis is upregulated in organoids upon Notch inhibition

Diagram illustrating enrichment of cilia-related genes in the list of upregulated targets (from the Notch inhibition microarray), obtained using the GOrilla platform. Color is indicative of p value, and therefore of scale of enrichment for a particular node, calculated by minimum hypergeometric score (mHG) method<sup>1</sup>.

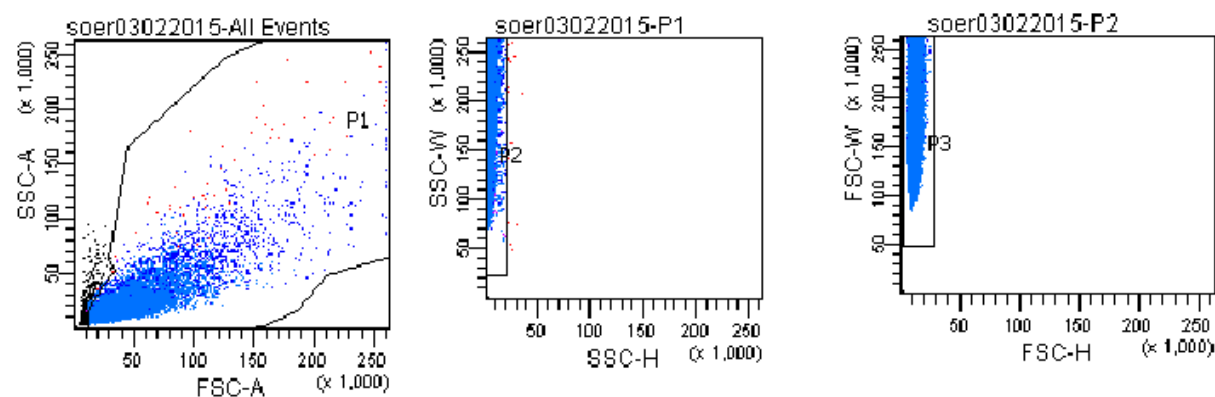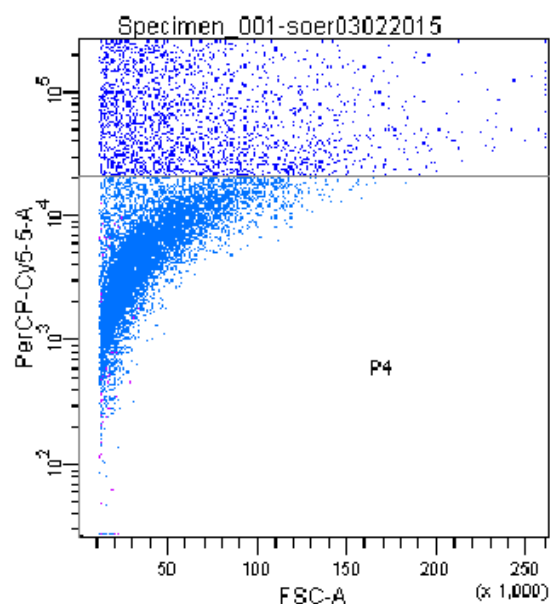

Tube: soer03022015

| Population | #Events | %Parent | %Total |
|------------|---------|---------|--------|
| All Events | 12,727  | ###     | 100.0  |
| P1         | 11,310  | 88.9    | 88.9   |
| P2         | 11,244  | 99.4    | 88.3   |
| P3         | 11,244  | 100.0   | 88.3   |
| P4         | 8,320   | 74.0    | 65.4   |
| P5         | 8,166   | 98.1    | 64.2   |

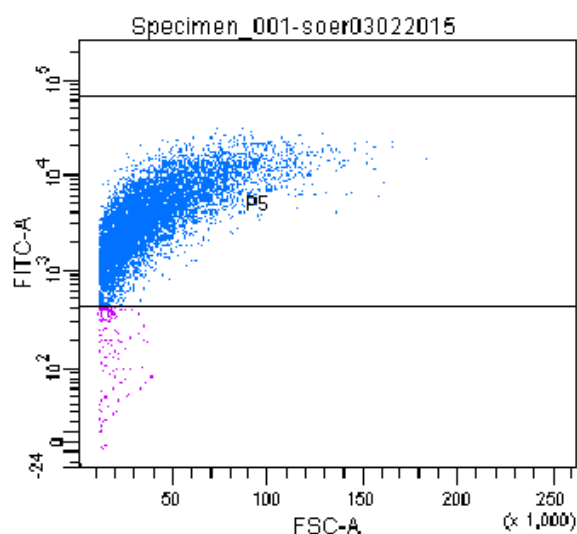

### Supplementary Fig. 6 Fluorescence-activated cell sorting of single EpCAM+ cells

Example of FACS sorting results for primary isolates from fallopian tube tissue showing high purity of EpCAM+ epithelial cells (>98%) which were then used in dilution for clonality assay in a 96-well format.

**Supplementary Table 1 Stem cell signature genes significantly downregulated in fallopian tube organoids upon DBZ treatment**

| Symbol   | Gene name                                                                                            |
|----------|------------------------------------------------------------------------------------------------------|
| ACPL2    | NA                                                                                                   |
| ARL4C    | ADP-ribosylation factor-like 4C                                                                      |
| ATM      | ATM serine/threonine kinase                                                                          |
| AXIN2    | axin 2                                                                                               |
| BCL2     | B-cell CLL/lymphoma 2                                                                                |
| CA12     | carbonic anhydrase XII                                                                               |
| CD320    | CD320 molecule                                                                                       |
| CDCA7    | cell division cycle associated 7                                                                     |
| CDK6     | cyclin-dependent kinase 6                                                                            |
| CITED4   | Cbp/p300-interacting transactivator, with Glu/Asp-rich carboxy-terminal domain, 4                    |
| CKAP2    | cytoskeleton associated protein 2                                                                    |
| CNN3     | calponin 3, acidic                                                                                   |
| DACH1    | dachshund family transcription factor 1                                                              |
| DCTD     | dCMP deaminase                                                                                       |
| EFNA4    | ephrin-A4                                                                                            |
| EHF      | ets homologous factor                                                                                |
| EPHA4    | EPH receptor A4                                                                                      |
| EVL      | Enah/Vasp-like                                                                                       |
| FARP1    | FERM, RhoGEF (ARHGEF) and pleckstrin domain protein 1 (chondrocyte-derived)                          |
| FSTL1    | folliculin-like 1                                                                                    |
| FZD2     | frizzled class receptor 2                                                                            |
| FZD7     | frizzled class receptor 7                                                                            |
| GAS6     | growth arrest-specific 6                                                                             |
| GIN51    | GIN5 complex subunit 1 (Psf1 homolog)                                                                |
| GREB1    | growth regulation by estrogen in breast cancer 1                                                     |
| IL17RD   | interleukin 17 receptor D                                                                            |
| ILF3     | interleukin enhancer binding factor 3, 90kDa                                                         |
| IMPDH2   | IMP (inosine 5'-monophosphate) dehydrogenase 2                                                       |
| IRF2BP2  | interferon regulatory factor 2 binding protein 2                                                     |
| KCNE3    | potassium channel, voltage gated subfamily E regulatory beta subunit 3                               |
| KCNQ1    | potassium channel, voltage gated KQT-like subfamily Q, member 1                                      |
| KIAA0922 | KIAA0922                                                                                             |
| KLHL23   | kelch-like family member 23                                                                          |
| KLHL24   | kelch-like family member 24                                                                          |
| KRT23    | keratin 23, type I                                                                                   |
| LRIG1    | leucine-rich repeats and immunoglobulin-like domains 1                                               |
| MAN2A2   | mannosidase, alpha, class 2A, member 2                                                               |
| MCC      | mutated in colorectal cancers                                                                        |
| MFGE8    | milk fat globule-EGF factor 8 protein                                                                |
| MPP3     | membrane protein, palmitoylated 3 (MAGUK p55 subfamily member 3)                                     |
| MPZL1    | myelin protein zero-like 1                                                                           |
| MYC      | v-myc avian myelocytomatosis viral oncogene homolog                                                  |
| MYO1B    | myosin IB                                                                                            |
| NAV1     | neuron navigator 1                                                                                   |
| OLFM4    | olfactomedin 4                                                                                       |
| PAICS    | phosphoribosylaminoimidazole carboxylase, phosphoribosylaminoimidazole succinocarboxamide synthetase |
| PCDH8    | protocadherin 8                                                                                      |
| PCK2     | phosphoenolpyruvate carboxykinase 2 (mitochondrial)                                                  |
| PHLDB2   | pleckstrin homology-like domain, family B, member 2                                                  |
| PLXNB1   | plexin B1                                                                                            |
| POGK     | pogo transposable element with KRAB domain                                                           |
| PRELP    | proline/arginine-rich end leucine-rich repeat protein                                                |

|          |                                                                    |
|----------|--------------------------------------------------------------------|
| PRKACB   | protein kinase, cAMP-dependent, catalytic, beta                    |
| PRKD3    | protein kinase D3                                                  |
| RASL11B  | RAS-like, family 11, member B                                      |
| RHOBTB3  | Rho-related BTB domain containing 3                                |
| RNF43    | ring finger protein 43                                             |
| SEMA7A   | semaphorin 7A, GPI membrane anchor (John Milton Hagen blood group) |
| SLC19A2  | solute carrier family 19 (thiamine transporter), member 2          |
| SLC23A3  | solute carrier family 23, member 3                                 |
| SMO      | smoothened, frizzled class receptor                                |
| SORCS2   | sortilin-related VPS10 domain containing receptor 2                |
| SOX4     | SRY (sex determining region Y)-box 4                               |
| SOX9     | SRY (sex determining region Y)-box 9                               |
| SP5      | Sp5 transcription factor                                           |
| TEAD2    | TEA domain family member 2                                         |
| TGIF2    | TGFB-induced factor homeobox 2                                     |
| TIMELESS | timeless circadian clock                                           |
| TLR2     | toll-like receptor 2                                               |
| TMEM132A | transmembrane protein 132A                                         |
| TNS3     | tensin 3                                                           |
| TRIM24   | tripartite motif containing 24                                     |
| TUBB2B   | tubulin, beta 2B class IIb                                         |
| ZBTB38   | zinc finger and BTB domain containing 38                           |
| ZNF462   | zinc finger protein 462                                            |
| ZNF618   | zinc finger protein 618                                            |
| ZNRF3    | zinc and ring finger 3                                             |
| ZRANB3   | zinc finger, RAN-binding domain containing 3                       |

## Supplementary References

1. Eden, E., Navon, R., Steinfeld, I., Lipson, D. & Yakhini, Z. GOrilla: a tool for discovery and visualization of enriched GO terms in ranked gene lists. *BMC Bioinformatics* **10**, 48 (2009).
